# Supplementary material
Source: HighWire-hosted journal article supplement (https://heart.bmj.com/content/108/16/1303)
Supplement: inline-supplementary-material-1 [file inline-supplementary-material-1.pdf]

**Supplementary Table 1. Comparison of clinical characteristics between patients who needed percutaneous coronary intervention during follow-up and those who did not among those with documented coronary artery spasm**

|                   | Patients with CAS | Later PCI (+) | Later PCI (-) |         |
|-------------------|-------------------|---------------|---------------|---------|
|                   | (n = 830)         | (n = 28)      | (n = 802)     | P-value |
| Age, years        | 54.7 ± 9.3        | 52.7 ± 8.2    | 54.8 ± 9.3    | 0.255   |
| Males             | 590 (71.1)        | 22 (78.6)     | 568 (70.8)    | 0.525   |
| Hypertension      | 256 (30.8)        | 11 (39.3)     | 245 (30.5)    | 0.405   |
| Diabetes mellitus | 70 (8.4)          | 0 (0.0)       | 70 (8.7)      | 0.160   |
| Dyslipidemia      | 313 (37.7)        | 13 (46.4)     | 300 (37.4)    | 0.330   |
| Smoking           | 411 (49.5)        | 16 (57.1)     | 395 (49.3)    | 0.447   |
| History of PCI    | 38 (4.6)          | 3 (10.7)      | 35 (4.4)      | 0.176   |
| RWMA on Erg Echo  |                   |               |               | 0.837   |

|                                 |            |           |            |       |
|---------------------------------|------------|-----------|------------|-------|
| RWMA in LAD territory           | 377 (45.4) | 18 (64.3) | 359 (44.8) |       |
| RWMA in RCA territory           | 308 (37.1) | 6 (21.4)  | 302 (37.7) |       |
| RWMA in LCX territory           | 113 (13.6) | 3 (10.7)  | 110 (13.7) |       |
| RWMA in multiple territories    | 28 (3.4)   | 1 (3.6)   | 27 (3.4)   |       |
| <b>Medication</b>               |            |           |            |       |
| CCB alone                       | 113 (13.6) | 5 (17.9)  | 108 (13.5) | 0.571 |
| CCB + nitrates                  | 637 (76.7) | 23 (82.1) | 614 (76.6) | 0.781 |
| Combination of more than 2 CCBs | 76 (9.2)   | 0 (0.0)   | 76 (9.5)   | 1.000 |

Values are mean ± standard deviation or n (%). PCI, percutaneous coronary intervention; RWMA, regional wall motion abnormality; LAD, left anterior descending artery; RCA, right coronary artery; LCX, left circumflex artery; CCB, calcium channel blocker.

Supplementary Table 2. Clinical characteristics of patients who underwent later percutaneous coronary intervention

|                             | Patients with PCI | CAS (+)    | CAS (-)    |         |
|-----------------------------|-------------------|------------|------------|---------|
|                             | (n = 62)          | (n = 28)   | (n = 34)   | P-value |
| Age, years                  | 55.7 ± 9.1        | 52.7 ± 8.2 | 58.2 ± 9.3 | 0.017   |
| Males                       | 42 (67.7)         | 22 (78.6)  | 20 (58.8)  | 0.112   |
| Hypertension                | 28 (45.2)         | 11 (39.3)  | 17 (50.0)  | 0.450   |
| Diabetes mellitus           | 4 (6.5)           | 0 (0.0)    | 4 (11.8)   | 0.120   |
| Dyslipidemia                | 31 (50.0)         | 13 (46.4)  | 18 (52.9)  | 0.799   |
| Smoking                     | 27 (43.5)         | 16 (57.1)  | 11 (32.4)  | 0.072   |
| History of PCI              | 5 (8.1)           | 3 (10.7)   | 2 (5.9)    | 0.650   |
| Clinically-driven later PCI |                   |            |            | 0.169   |
| Asymptomatic                | 6 (9.7)           | 5 (17.9)   | 1 (2.9)    |         |

|                     |           |           |           |
|---------------------|-----------|-----------|-----------|
| Worsening angina    | 45 (72.6) | 17 (60.7) | 28 (82.4) |
| NSTEMI              | 7 (11.3)  | 4 (14.3)  | 3 (8.8)   |
| STEMI               | 4 (6.5)   | 2 (7.1)   | 2 (5.9)   |
| Later PCI territory |           |           | 0.576     |
| LAD                 | 28 (45.2) | 14 (50.0) | 14 (41.2) |
| Non-LAD             | 19 (30.6) | 9 (32.1)  | 10 (29.4) |
| Multivessel         | 15 (24.2) | 5 (17.9)  | 10 (29.4) |

**Supplementary Table 3. Coronary artery territory who underwent later percutaneous coronary intervention after documentation of coronary artery spasm**

|                                      | Later PCI | LAD CAS  | Non-LAD  |       |
|--------------------------------------|-----------|----------|----------|-------|
|                                      | (N = 28)  | (N = 18) | (N = 10) | P     |
| <b>Later PCI territory</b>           |           |          |          |       |
| LAD                                  | 14        | 13       | 1        |       |
| Non-LAD                              | 9         | 1        | 8        |       |
| Multiple territories                 | 5         | 4        | 1        |       |
| 3 vessels                            | 1         | 1        | 0        |       |
| LAD and RCA                          | 2         | 1        | 1        |       |
| LAD and LCX                          | 1         | 1        | 0        |       |
| RCA and LCX                          | 1         | 1        | 0        |       |
| Concordance of CAS and PCI territory |           | 16/18    | 9/10     | 1.000 |

PCI, percutaneous coronary intervention; CAS, coronary artery spasm; LAD, left anterior descending coronary artery; RCA, right coronary artery; LCX, left circumflex coronary artery.
